# Supplementary material for: Plasmonic ELISA based on the controlled growth of silver nanoparticles
Source: Royal Society of Chemistry journal article supplement (doi:10.1039/c6nr06079j), 2016-01-01
Supplement: c6nr06079j1.pdf [file c6nr06079j1.pdf]

Supporting Information for

**Plasmonic ELISA Based on Controlled Growth of Silver Nanoparticles**

*Zhihong Xuan,<sup>a</sup> Mingmin Li,<sup>a</sup> Pengfei Rong,<sup>c</sup> Wei Wang,<sup>c</sup> Yijun Li,<sup>\*a</sup> Dingbin Liu<sup>\*,a,b</sup>*

*<sup>a</sup>College of Chemistry, Research Center for Analytical Sciences, State Key Laboratory of Medicinal Chemical Biology, and Tianjin Key Laboratory of Molecular Recognition and Biosensing, Nankai University, Tianjin 300071, China.*

*<sup>b</sup>Collaborative Innovation Center of Chemical Science and Engineering (Tianjin), Tianjin 300071, China.*

*<sup>c</sup>Department of Radiology, The Third Xiangya Hospital, Central South University, Changsha, Hunan 410013, China.*

## **Contents**

1. Optimization of experimental conditions for the growth of AgNPs (**Figure S1-S2**).
2. A comparison of colorimetric assays for sensing ALP (**Table S1**).
3. TEM images of the obtained AgNPs (**Figure S3**).
4. Detection of ALP activity using the classical pNPP-based assay (**Figure S4**).
5. The dynamic curves of concentration-dependent growth of AgNPs (**Figure S5**).
6. Enzyme specificity Investigation (**Figure S6**).
7. Enzyme inhibitor Investigation (**Figure S7**).
8. Experimental details of conjugating ALP with detection antibodies (**Figure S8, S9 and Table S2, S3**).
9. Detailed information of clinical serum samples used in this study (**Table S4-S6**).
10. **Supplementary Methods**.
  - 1) The detailed procedures for controlling the ALP-mediated growth of AgNPs.
  - 2) Conjugation of NHS-activated biotin to detection antibodies.
  - 3) The experimental details for conjugating ALP with detection antibodies.
  - 4) Procedures for HRP-based ELISA.

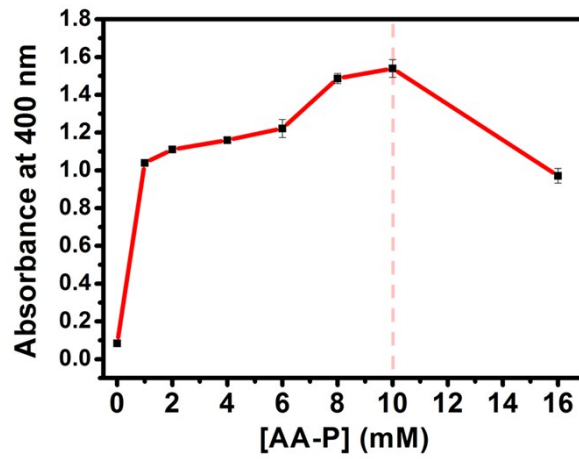

**Figure S1.** Effect of AA-P concentrations on the growth of AgNPs. 10 U/L ALP, 160 mM DEA buffer, and 30 mM AgNO<sub>3</sub> were used in this study. Error bars show the standard deviations of three independent measurements.

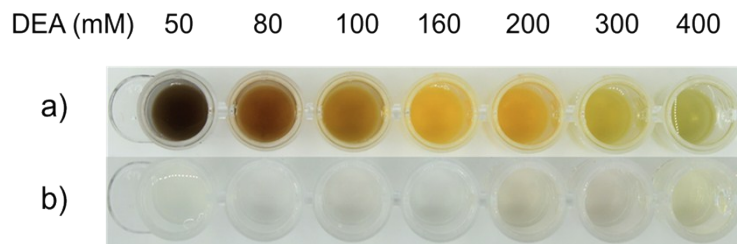

**Figure S2.** Effect of DEA concentrations on the growth of AgNPs. Photographs of the obtained AgNPs dispersed in DEA buffer with various concentrations, pretreated with 10 mM AA-P and 30 mM AgNO<sub>3</sub> in the presence (a) and absence (b) of 10 U/L ALP.

**Table S1.** A comparison of colorimetric assays for sensing ALP.

| Material | Approach                                           | Readout     | Naked-eye | LOD                              | Ref        |
|----------|----------------------------------------------------|-------------|-----------|----------------------------------|------------|
| AuNPs    | Click chemistry-triggered nanoparticle aggregation | Colorimetry | 5 U/L     | 0.2 U/L                          | 1          |
| AuNRs    | Silver nanoshell deposition on AuNR                | Colorimetry | 20 U/L    | 3.3 U/L                          | 2          |
| AuNPs    | charge-induced nanoparticle aggregation            | Colorimetry | -         | 1.7 $\mu$ M                      | 3          |
| AuNPs    | non-crosslinking nanoparticle aggregation          | Colorimetry | -         | 8 U/mL                           | 4          |
| AuNPs    | charge-induced nanoparticle aggregation            | Colorimetry | -         | 10 U/L                           | 5          |
| AuNRs    | etching of AuNRs                                   | Colorimetry | 0.2 U/L   | 0.01 U/L                         | 6          |
| Au NPs   | Silver deposition on the surface of AuNPs          | Colorimetry | -         | 12fM ~ $1.2 \times 10^{-5}$ U/mL | 7          |
| AgNPs    | ALP-mediated AgNP growth                           | Colorimetry | 0.5 U/L   | 0.03 U/L                         | This study |

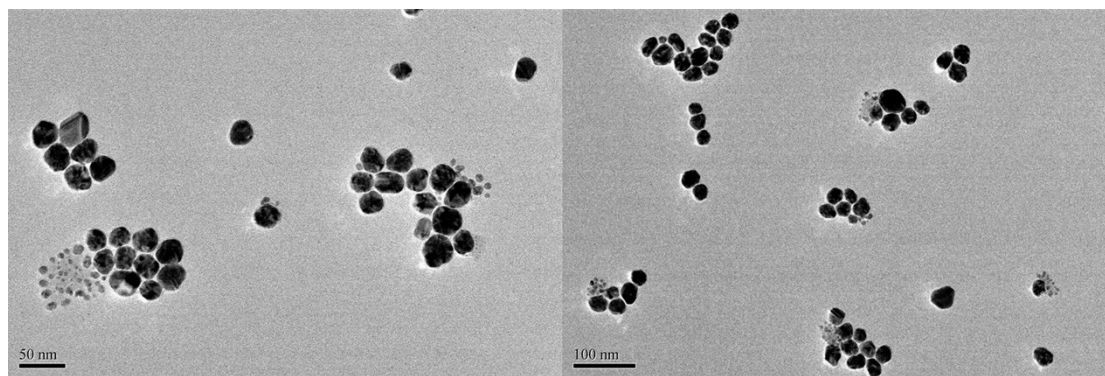

**Figure S3.** TEM images of AgNPs obtained with the mixing of 5 U/L of ALP, 10 mM AA-P, and 30 mM AgNO<sub>3</sub>. Scale bars: 50 nm (left) and 100 nm (right).

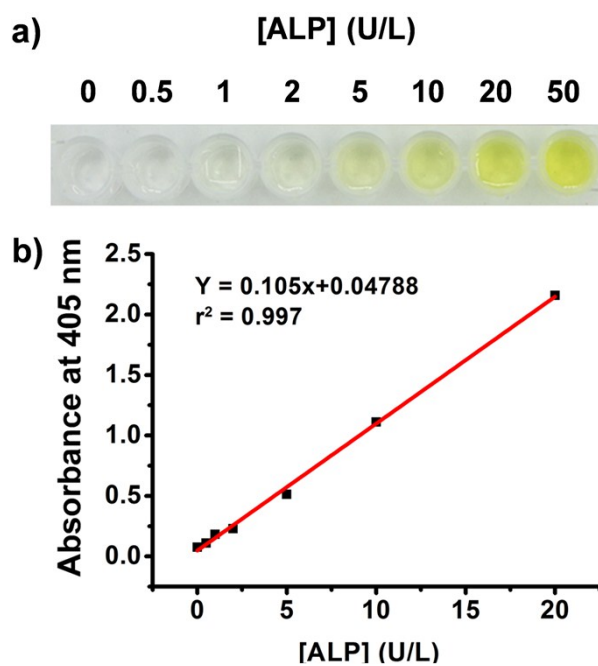

**Figure S4.** Detection of ALP activity using the classical pNPP-based assay. a) Naked-eye results of ALP detection with various concentrations ranging from 0 to 50 U/L. b) The absorbance of the pNPP products at 405 nm plotting the concentrations of ALP in a).

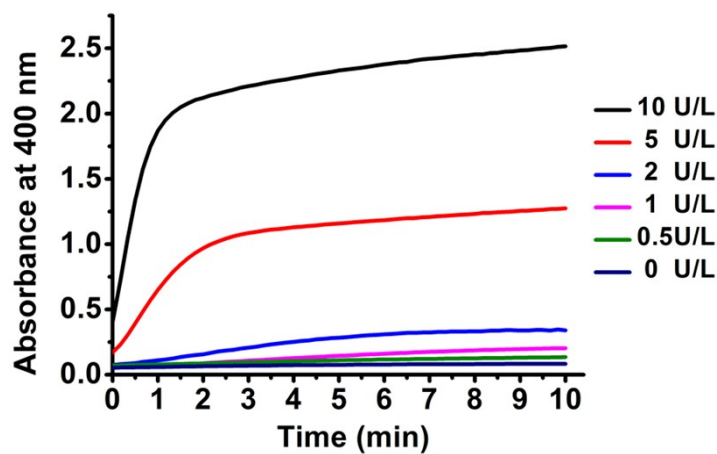

**Figure S5.** The dynamic process of the AgNPs growth at various concentrations of ALP from 0-10 U/L.

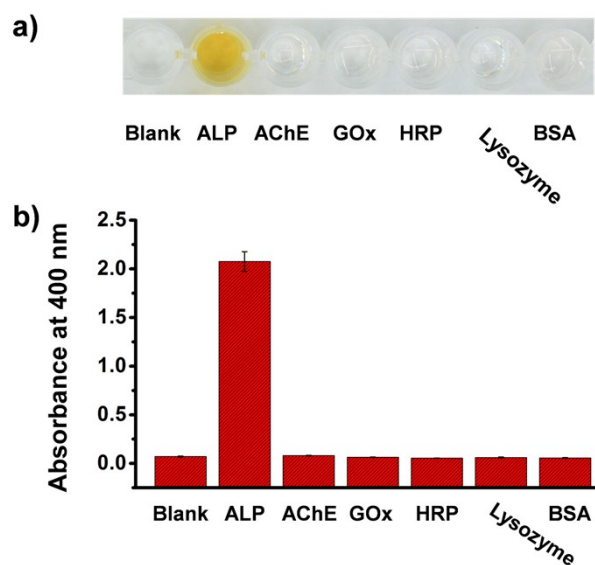

**Figure S6.** The specificity investigation of the AgNP-based plasmonic assay by incubating AA-P (10 mM) with ALP and a panel of other enzymes with the same concentration (10 U/L) and 1 mg/mL of BSA, followed by adding 30 mM of AgNO<sub>3</sub>.

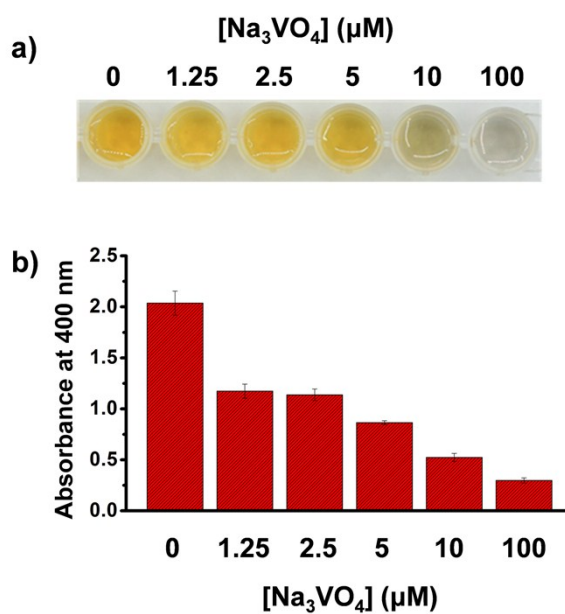

**Figure S7.** Enzyme inhibitor investigation by treating ALP (10 U/L) with various concentrations of Na<sub>3</sub>VO<sub>4</sub> (0-100 μM), followed by adding AA-P (10 mM) and incubated at 37 °C for 1 h, then AgNO<sub>3</sub> (30 mM) was added to the obtained solutions.

**Table S2.** Optimizing the concentration of biotinylated detection antibody.

| [AFP] (ng/mL)                 | 100  |      |      |      |      | 0     |       |       |       |       |
|-------------------------------|------|------|------|------|------|-------|-------|-------|-------|-------|
| [SA-ALP] ( $\mu\text{g/mL}$ ) | 1    |      |      |      |      |       |       |       |       |       |
| [biotin-Ab2] (ng/mL)          | 0.5  | 1    | 1.5  | 2    | 4    | 0.5   | 1     | 1.5   | 2     | 4     |
| $\bar{A}_{400\text{ nm}}$     | 0.41 | 0.79 | 0.93 | 1.15 | 1.24 | 0.073 | 0.089 | 0.095 | 0.136 | 0.176 |

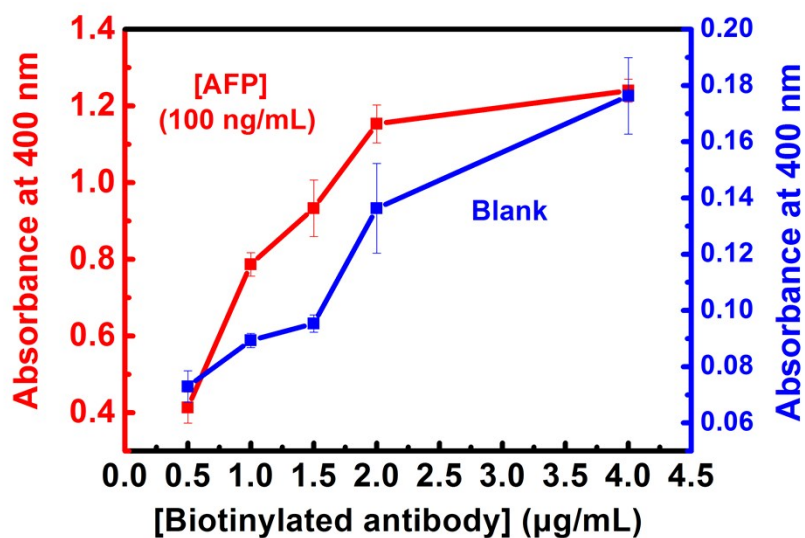

**Figure S8.** Optimizing the concentration of biotinylated detection antibody (the concentration of AFP is 100 ng/mL; the concentration of SA-ALP is 1  $\mu\text{g/mL}$ ). The absence of AFP was employed as the blank.

**Table S3.** Optimizing the concentration of SA-ALP.

| [AFP] (ng/mL)                     | 100  |      |      |     |      | 0     |       |       |       |       |
|-----------------------------------|------|------|------|-----|------|-------|-------|-------|-------|-------|
| [biotin-Ab2] ( $\mu\text{g/mL}$ ) | 2    |      |      |     |      |       |       |       |       |       |
| [SA-ALP] ( $\mu\text{g/mL}$ )     | 0.5  | 0.8  | 1    | 0.5 | 2    | 0.5   | 0.8   | 1     | 0.5   | 2     |
| $\bar{A}_{400\text{ nm}}$         | 0.45 | 0.82 | 0.99 | 1.2 | 1.57 | 0.074 | 0.092 | 0.097 | 0.194 | 0.303 |

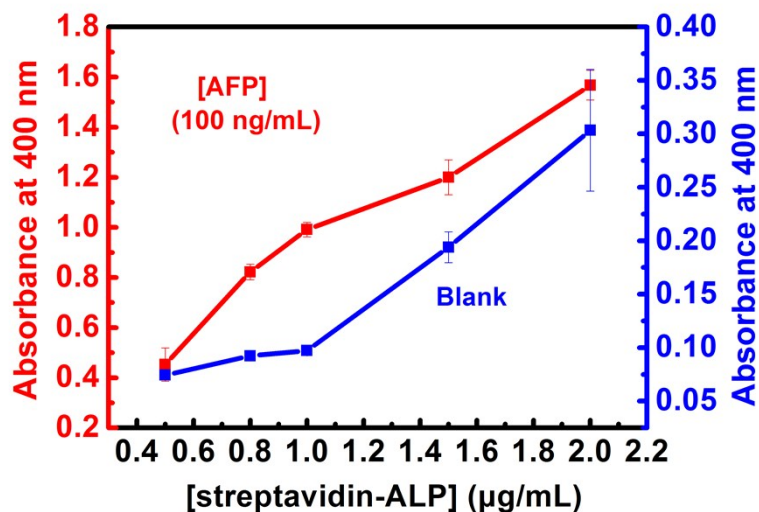

**Figure S9.** Optimizing the concentration of SA-ALP (the concentration of AFP is 100 ng/mL; the concentration of biotin-Ab2 is 2  $\mu\text{g/mL}$ ). The absence of AFP was employed as the blank.

**Table S4.** Detailed Information of the 54 serum samples collected from different people and the absorbance at 400 nm or 450 nm using the plasmonic ELISA and the HRP-based ELISA. (F and M are the abbreviation of female and male, respectively)



| Plates No. | Supplied by hospital |            |         |                  | Plasmonic ELISA |                          | HRP-based ELISA |                          |
|------------|----------------------|------------|---------|------------------|-----------------|--------------------------|-----------------|--------------------------|
|            | Serum No.            | Age (year) | Gender  | Cancer type      | OD 400 nm       | AFP positive or negative | OD 450nm        | AFP positive or negative |
| A1         | 30                   | 46         | F       | Normal           | 0.29            | Positive                 | 0.066           | Negative                 |
| A2         | 29                   | 46         | F       | Normal           | 0.418           | Positive                 | 0.081           | Negative                 |
| A3         | 9                    | 60         | M       | Normal           | 0.808           | Positive                 | 0.076           | Negative                 |
| A4         | 493                  | 78         | M       | Lung cancer      | 0.346           | Positive                 | 0.112           | Negative                 |
| A5         | 282                  | 65         | M       | Colon cancer     | 0.358           | Positive                 | 0.08            | Negative                 |
| A6         | 109                  | 46         | M       | Rectal cancer    | 0.265           | Positive                 | 0.091           | Negative                 |
| A7         | 151                  | 37         | F       | Gastric cancer   | > 4             | Positive                 | > 4             | Positive                 |
| A8         | 111                  | 45         | M       | Liver cancer     | > 4             | Positive                 | > 4             | Positive                 |
| A9         | 447                  | 57         | M       | Liver cancer     | > 4             | Positive                 | > 4             | Positive                 |
| B1         | 265                  | 77         | F       | Rectal cancer    | 0.71            | Positive                 | 0.073           | Negative                 |
| B2         | 10                   | 51         | F       | Normal           | 0.315           | Positive                 | 0.074           | Negative                 |
| B3         | 93                   | 41         | M       | Uncertain        | 1.006           | Positive                 | 0.307           | Positive                 |
| B4         | 442                  | 48         | M       | Lung cancer      | 0.376           | Positive                 | 0.085           | Negative                 |
| B5         | 184                  | 71         | M       | Colon cancer     | 0.704           | Positive                 | 0.082           | Negative                 |
| B6         | 118                  | 56         | F       | Breast cancer    | 0.397           | Positive                 | 0.074           | Negative                 |
| B7         | 183                  | 58         | F       | Colon cancer     | 0.724           | Positive                 | 0.118           | Negative                 |
| B8         | 422                  | 73         | M       | Lung cancer      | 0.452           | Positive                 | 0.099           | Negative                 |
| B9         | 144                  | 58         | F       | Lung cancer      | 0.409           | Positive                 | 0.114           | Negative                 |
| C1         | 363                  | 74         | M       | Normal           | 0.331           | Positive                 | 0.081           | Negative                 |
| C2         | 75                   | 40         | M       | Uncertain        | > 4             | Positive                 | > 4             | Positive                 |
| C3         | 364                  | 80         | M       | Normal           | 0.273           | Positive                 | 0.083           | Negative                 |
| C4         | 429                  | 68         | M       | Gastric cancer   | 0.311           | Positive                 | 0.085           | Negative                 |
| C5         | 508                  | 66         | M       | Gastric cancer   | 1.073           | Positive                 | 0.094           | Negative                 |
| C6         | 119                  | 64         | M       | Lung cancer      | 0.298           | Positive                 | 0.077           | Negative                 |
| C7         | 108                  | 62         | M       | Liver cancer     | 1.739           | Positive                 | 0.53            | Positive                 |
| C8         | 150                  | 59         | M       | Bile duct cancer | 0.346           | Positive                 | 0.107           | Negative                 |
| C9         | 552                  | 33         | M       | Liver cancer     | > 4             | Positive                 | > 4             | Positive                 |
| D1         | 311                  | 57         | F       | Normal           | 0.519           | Positive                 | 0.082           | Negative                 |
| D2         | 322                  | 50         | F       | Normal           | 0.121           | Negative                 | 0.077           | Negative                 |
| D3         | 314                  | 76         | M       | Normal           | 0.271           | Positive                 | 0.082           | Negative                 |
| D4         | 172                  | 29         | F       | Normal           | 0.636           | Positive                 | 0.098           | Negative                 |
| D5         | 130                  | 60         | F       | Breast cancer    | 0.927           | Positive                 | 0.083           | Negative                 |
| D6         | 120                  | Unknown    | Unknown | Normal           | 0.528           | Positive                 | 0.08            | Negative                 |
| D7         | 362                  | 37         | F       | Colon cancer     | 0.293           | Positive                 | 0.351           | Negative                 |
| D8         | 307                  | 75         | M       | Liver cancer     | 0.983           | Positive                 | 0.3             | Positive                 |
| D9         | 349                  | 50         | M       | Colon cancer     | 0.34            | Positive                 | 0.092           | Negative                 |
| E1         | 366                  | Unknown    | Unknown | Uncertain        | 0.997           | Positive                 | 0.076           | Negative                 |
| E2         | 316                  | 80         | M       | Normal           | 0.598           | Positive                 | 0.079           | Negative                 |
| E3         | 20                   | 41         | F       | normal           | 0.424           | Positive                 | 0.083           | Negative                 |
| E4         | 415                  | 67         | M       | gastric cancer   | 0.482           | Positive                 | 0.081           | Negative                 |
| E5         | 110                  | 46         | M       | Uncertain        | 0.407           | Positive                 | 0.089           | Negative                 |
| E6         | 121                  | 51         | M       | lung cancer      | 0.372           | Positive                 | 0.081           | Negative                 |
| E7         | 533                  | 56         | M       | Lung cancer      | 0.457           | Positive                 | 0.09            | Negative                 |
| E8         | 194                  | 62         | M       | Lung cancer      | 0.757           | Positive                 | 0.09            | Negative                 |
| E9         | 563                  | 66         | F       | liver cancer     | > 4             | Positive                 | > 4             | Positive                 |
| F1         | 19                   | Unknown    | Unknown | Normal           | 0.324           | Positive                 | 0.07            | Negative                 |
| F2         | 180                  | 65         | F       | Rectal cancer    | 0.393           | Positive                 | 0.074           | Negative                 |
| F3         | 546                  | 86         | F       | Uncertain        | > 4             | Positive                 | > 4             | Positive                 |
| F4         | 140                  | 67         | M       | Lung cancer      | 0.474           | Positive                 | 0.078           | Negative                 |
| F5         | 158                  | 68         | F       | Normal           | 0.598           | Positive                 | 0.077           | Negative                 |
| F6         | 576                  | 49         | F       | Rectal cancer    | 0.416           | Positive                 | 0.075           | Negative                 |
| F7         | 439                  | 49         | M       | Lung cancer      | 0.344           | Positive                 | 0.105           | Negative                 |
| F8         | 273                  | 72         | M       | Osteosarcoma     | 0.387           | Positive                 | 0.042           | Negative                 |
| F9         | 92                   | 49         | M       | Liver cancer     | > 4             | Positive                 | > 4             | Positive                 |

**Table S5.** The statistical number of the different cancer types among the 54 serum samples.

| Cancer type | Liver cancer | Gastric cancer | Lung cancer | Colon cancer | Rectal cancer | Breast cancer | Osteosarcoma | Bile duct cancer | Normal | Uncertain | Sum |
|-------------|--------------|----------------|-------------|--------------|---------------|---------------|--------------|------------------|--------|-----------|-----|
| Number      | 7            | 4              | 10          | 5            | 4             | 2             | 1            | 1                | 15     | 5         | 54  |

**Table S6.** The detail information of the 7 samples experienced therapeutics and the absorbance at 400 nm or 450 nm using the plasmonic ELISA and the HRP-based ELISA. (F and M are the abbreviation of female and male, respectively)

| Plates No. | Supplied by hospital |            |        |                                                               | Plasmonic ELISA |                          | HRP-based ELISA |                          |
|------------|----------------------|------------|--------|---------------------------------------------------------------|-----------------|--------------------------|-----------------|--------------------------|
|            | Serum No.            | Age (year) | Gender | Cancer types & Treatment protocols or Results                 | OD 400 nm       | AFP positive or negative | OD 450nm        | AFP positive or negative |
| 1          | 20                   | 41         | F      | Hepatocellular carcinoma after interventional therapy         | > 4             | Positive                 | > 4             | Positive                 |
| 2          | 95                   | 67         | M      | Hepatocellular carcinoma after interventional therapy         | 1.469           | Positive                 | 0.13            | Negative                 |
| 3          | 125                  | 48         | M      | Large area of lung cancer metastasis and then chemotherapy    | 0.421           | Positive                 | 0.121           | Negative                 |
| 4          | 416                  | 50         | F      | Lung cancer after treatment                                   | 0.685           | Positive                 | 0.12            | Negative                 |
| 5          | 424                  | 51         | F      | Sigmoid colon cancer after postoperative and chemotherapy     | 0.365           | Positive                 | 0.112           | Negative                 |
| 6          | 458                  | 66         | M      | Hepatic metastasis of colonic carcinoma and then chemotherapy | 0.416           | Positive                 | 0.12            | Negative                 |
| 7          | 475                  | 58         | F      | Multiple transfer of colon cancer and then chemotherapy       | 0.946           | Positive                 | 0.12            | Negative                 |

## Supplementary Methods

**The detailed procedures for controlling the ALP-mediated growth of AgNPs.** The most effective working pH and incubation temperature for ALP activity are 9.8 and 37 °C respectively.<sup>2</sup> Under these conditions, other experimental parameters including AA-P concentration, AgNO<sub>3</sub> concentration, DEA concentration were carefully investigated since they are sensitive to the growth of AgNPs. As shown in Figure S1, the absorbance at 400 nm of the obtained AgNPs increased when AA-P concentrations increased from 0 to 10 mM but then decreased from 10 to 16 mM. It is reasonable that higher concentrations of AA-P may produce more AA, thus catalyzing the formation

of more AgNPs. However, higher concentrations of AA-P could make the formed AgNPs aggregate within a few minutes, which is likely attributed to the high concentrations of salts in the obtained AgNPs solutions. Thus, the optimal concentration of AA-P here is 10 mM.

To ensure the oxidation-reduction reaction between AA and AgNO<sub>3</sub> proceeds rapidly and AA can be consumed as much as possible, excess AgNO<sub>3</sub> (30 mM) should be added to the mixtures.

DEA buffer at pH 9.8 offers the alkaline environment for the catalytic hydrolysis of ALP toward AA-P. The concentration of the DEA buffer used in this study is vital for the growth of AgNPs. Lower (50-100 mM) or higher (300-400 mM) concentration of DEA buffer neither obtained settled solution until the concentration is at suitable values (160-200 mM) (Figure S3a). According to the previous report,<sup>6</sup> DEA buffer is crucial for preventing the formation of the silver hydroxide precipitates under alkaline conditions. Therefore, the muddy brown solutions obtained in 50-100 mM DEA buffers can be attributed to the formation of silver hydroxide precipitate. The reason why higher concentrations of DEA buffer (300-400 mM) lead to slightly dark yellow solution is still unknown (Figure S2a). Nonetheless, higher concentrations of DEA buffer could also result in the self-hydrolysis of AA-P (Figure S2b), thus may induce background noise even in the absence of detection targets. In order to avoid the presence of the silver hydroxide precipitate and the self-hydrolysis of AA-P, 160 mM of DEA buffer was used throughout this study.

Taken together, the optimal concentrations of AA-P, AgNO<sub>3</sub>, and DEA buffer are 10 mM, 30 mM, and 160 mM respectively.

**Conjugation of NHS-activated biotin to detection antibodies.** NHS-activated biotin was dissolved in dry DMSO before diluting in final reaction buffer. Detection antibodies (Ab2) were prepared in 100  $\mu$ L of PBS (pH 7.4) at a concentration of 1.0 mg/mL. Then, the NHS-biotin (6 mM, 3  $\mu$ L) was mixed with the Ab2 solution at a 30:1 mole ratio and incubated at room temperature for 4 h with mild concussion. The reaction was stopped by adding quenching buffer (1 M Tris-HCl, pH 8) to a final concentration of 50 mM Tris and allowing the quenching reaction to proceed at room temperature for 5 min. The resulting products were purified by using a centrifugal filter device (Amicon Ultra-0.5, Millipore) with a 30K Nominal Molecular Weight Limit (NMWL).

**The experimental details for conjugating ALP with detection antibodies.** To avoid the false positive signals produced by nonspecific adsorption of the biotinylated antibody (biotin-Ab2) or the SA-ALP, their concentrations for fabricating the plasmonic ELISA were investigated. Various concentrations of biotin-Ab2 from 0.5 to 4  $\mu\text{g/mL}$  were incubated with aliquots of 100 ng/mL AFP and 1  $\mu\text{g/mL}$  of SA-ALP in the capture antibody-immobilized wells, respectively (Table S2). As depicted in Figure S8, the absorbance at 400 nm intensified as the concentration of biotin-Ab2 increased. When the concentrations increased to be 2 and 4  $\mu\text{g/mL}$ , the maximal absorbance can be achieved. In contrast, the absence of AFP induce a negligible increase of absorbance for lower concentrations of biotin-Ab2. However, false-positive signals can be observed when the concentrations of biotin-Ab2 increased up to 2  $\mu\text{g/mL}$ . Therefore, to avoid false positive signals in blank wells and to obtain strong specific signals simultaneously, 2  $\mu\text{g/mL}$  of biotin-Ab2 is chosen in this study. In addition, the concentration of SA-ALP was optimized to be 1  $\mu\text{g/mL}$  by the same principle (Table S3, Figure S9).

**Procedures for HRP-based ELISA.** We performed the detection procedures strictly by following the recommended steps as received. Briefly, 100  $\mu\text{L}$  of different concentrations of AFP standard solutions were added to the capture antibody-coated microplates and incubated at 37  $^{\circ}\text{C}$  for 20 min. After incubation, the wells were washed three times with washing buffer. Then, 100  $\mu\text{L}$  of HRP-linked antibodies were added to each well and incubated at 37  $^{\circ}\text{C}$  for 15 min. Following the same washing steps, 50  $\mu\text{L}$  chromogenic A and 50  $\mu\text{L}$  chromogenic B were added to the plate successively and then the plate was standing at room temperature for 5 min. At last, 50  $\mu\text{L}$  stop solution was added to stop the catalytic process and the optical density at the wavelength of 450 nm was detected by a Synergy 2 Multi-Mode Microplate Reader.

The serum samples were also measured by a commercial HRP-based ELISA kit. The procedure is the same as that for the AFP standard solutions except that the 100  $\mu\text{L}$  AFP standard solution was replaced by 50  $\mu\text{L}$  serum.

## References

1. Y. Xianyu, Z. Wang and X. Jiang, *ACS. Nano*, 2014, **8**, 12741-12747.
2. Z. Gao, K. Deng, X.-D. Wang, M. Miró and D. Tang, *ACS Appl. Mater. Interfaces*, 2014, **6**,

18243-18250.

3. Y. Choi, N. H. Ho and C. H. Tung, *Angew. Chem. Int. Ed*, 2007, **46**, 707-709.
4. W. Zhao, W. Chiuman, J. C. Lam, M. A. Brook and Y. Li, *Chem. Commun*, 2007, 3729-3731.
5. C. M. Li, S. J. Zhen, J. Wang, Y. F. Li and C. Z. Huang, *Biosens. Bioelectron*, 2013, **43**, 366-371.
6. Z. Zhang, Z. Chen, S. Wang, F. Cheng and L. Chen, *ACS Appl. Mater. Interfaces*, 2015, **7**, 27639-27645.
7. C. H. Zhou, J. Y. Zhao, D. W. Pang and Z. L. Zhang, *Anal. Chem*, 2014, **86**, 2752-2759.
